# Supplementary material
Source: Springer Nature journal article supplement (https://www.springermedizin.de/resource/supplementary/13058_2010_9479_MOESM4_ESM.pdf/9702240)

## B) Scatter plots of Pokemon target genes

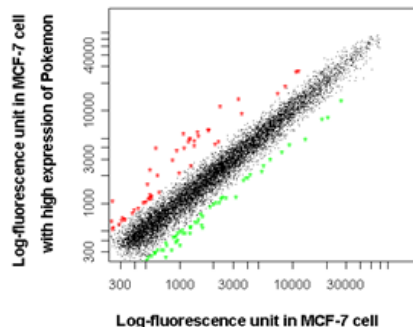

## A) Pokemon expression

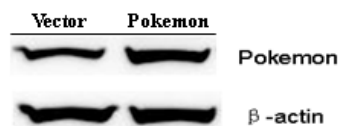

## C) Functional classification of Pokemon target genes

| Apoptosis | Cell cycle | Cell growth    | Transcription | Signal       | Biosynthesis | Transport       |
|-----------|------------|----------------|---------------|--------------|--------------|-----------------|
|           |            | Diffrentiation | regulation    | Transduction | Metabolism   | and ion channel |
| SULF1     | DUSP1      | SLC2A1         | CARS          | STC2         | MGC22265     | KCNJ4           |
| BIRC5     | JUN        | DDIT3          | RREB1         | WNT6         | RBKS         | PKD2            |
| TRIB3     | CKS2       | NGFR           | DUSP1         | PLD2         | FUT1         | COL4A6          |
| TNFRSF12A | CDC14B     | TRIB3          | WARS          | SULF1        | RREB1        | VMD2            |
| NGFR      |            | C5             | CARS          | EFNA3        | RHOB         |                 |
| RHOB      |            | BCAT1          | DDIT3         | CXXC5        | MAWBP        |                 |
| BCLAF1    |            | PCK2           | TRIB3         | CRLF1        | PCK2         |                 |
| P8        |            | PAX1           | SR140         | STC2         | FUT1         |                 |
| BCLAF1    |            | DDIT3          |               |              | SAT          |                 |
| MYO1A     |            | ZMPSTE24       |               |              | CNNM2        |                 |
| PLCXD1    |            | TRIB3          |               |              | DUSP1        |                 |
|           |            |                |               |              | PLD2         |                 |

## D) Survivin expression affected by Pokemon

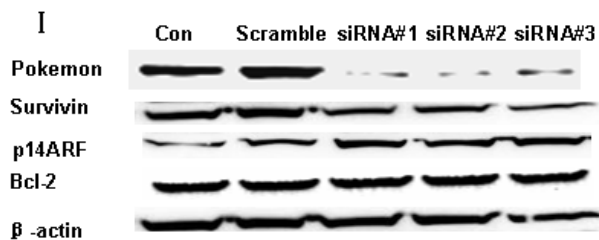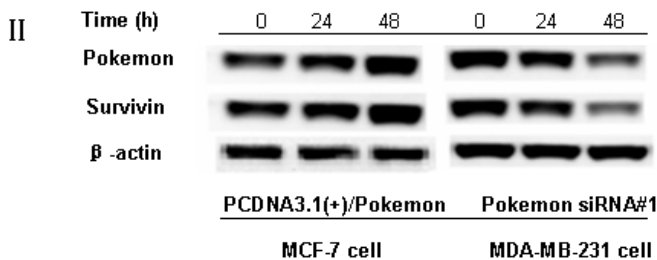

Supplement: MOESM4 [file 9702240]
